# Supplementary material
Source: publisher site journal article supplement (https://static.cambridge.org/content/id/urn:cambridge.org:id:article:S1754470X20000252/resource/name/S1754470X20000252supp001.docx)
Supplement: Supplementary file 1 [file S1754470X20000252supp001.docx]

Supplementary material

Table 2: Conversion to categorical variables

| **Patient variables** | **Conversion to categorical data** |
| --- | --- |
| Patient age | 0/1 (Older or younger than the median) |
| Patient gender | 0/1 (male/female) |
| Severity PHQ-9 | 0/1 (Above or below the median) |
| Severity GAD-7 | 0/1 (Above or below the median) |
| Recovery | 0/1 (yes/no) |
| Reliable improvement | 0/1 (yes/no) |
| **Therapist variables** |  |
| Adherence to an evidence-based protocol | 0/1 (yes/no for each patient treated) |
| F score | 1-4 based on which quartile the F score fell within |
